# Supplementary material for: Irreversible Electroporation for Liver Metastases from Colorectal Cancer: A Systematic Review
Source: MDPI journal article supplement (doi:10.3390/cancers15092428), 2023-04-24
Supplement: s1 [file s1]

# Supplementary Material: Irreversible electroporation for liver metastases from colorectal cancer: A systematic review.

Harry VM Spiers<sup>1,2</sup>, Francesco Lancellotti<sup>3</sup>, Nicola de Liguori Carino<sup>3</sup>, Sanjay Pandanaboyana<sup>4</sup>, Adam E Frampton<sup>5</sup>, Santhalingam Jegatheeswaran<sup>3</sup>, Vinotha Nadarajah<sup>6</sup> and Ajith K Siriwardena<sup>3\*</sup>.

Supplementary Table S1: Full search strategy. \* Patients underwent IRE followed by liver resection of the ablated tumour.

| #                                                                  | Search Term                                                                          | Result |
|--------------------------------------------------------------------|--------------------------------------------------------------------------------------|--------|
| <i>Embase &lt;1974 to 2023 6<sup>th</sup> January 13&gt;</i>       |                                                                                      |        |
| 1                                                                  | exp irreversible electroporation/                                                    | 1315   |
| 2                                                                  | irreversible electroporation.ti,ab.                                                  | 1934   |
| 3                                                                  | exp colon cancer/                                                                    | 322851 |
| 4                                                                  | colon cancer.ti,ab.                                                                  | 77988  |
| 5                                                                  | rectum cancer.ti,ab.                                                                 | 267454 |
| 6                                                                  | exp colorectal cancer/                                                               | 946    |
| 7                                                                  | colorectal cancer.ti,ab.                                                             | 220224 |
| 8                                                                  | exp liver metastasis/                                                                | 183674 |
| 9                                                                  | liver metast*.ti,ab                                                                  | 73307  |
| 10                                                                 | 1 or 2                                                                               | 45024  |
| 11                                                                 | 3 or 4                                                                               | 340055 |
| 12                                                                 | 5 or 6                                                                               | 267680 |
| 13                                                                 | 7 or 8                                                                               | 260385 |
| 14                                                                 | 9 or 10                                                                              | 82537  |
| 15                                                                 | 12 or 13 or 14 or 15                                                                 | 466324 |
| 16                                                                 | 11 and 16                                                                            | 24     |
| <i>Ovid MEDLINE(R) &lt;1946 to January 13th 2023&gt;</i>           |                                                                                      |        |
| 1                                                                  | exp Electroporaion/                                                                  | 9356   |
| 2                                                                  | irreversible electroporation.ti,ab.                                                  | 953    |
| 3                                                                  | exp Colonic Neoplasms/                                                               | 81250  |
| 4                                                                  | colon cancer*.ti,ab.                                                                 | 48164  |
| 5                                                                  | exp Rectal Neoplasms/                                                                | 52895  |
| 6                                                                  | rectal cancer*.ti,ab.                                                                | 24746  |
| 7                                                                  | exp Colorectal Neoplasms/                                                            | 231779 |
| 8                                                                  | colorectal cancer*.ti,ab.                                                            | 107151 |
| 9                                                                  | exp Liver Neoplasms/                                                                 | 188863 |
| 10                                                                 | liver metast*.ti,ab.                                                                 | 25275  |
| 11                                                                 | hepatic metast*.ti,ab.                                                               | 7282   |
| 12                                                                 | 1 or 2                                                                               | 9496   |
| 13                                                                 | 3 or 4                                                                               | 101082 |
| 14                                                                 | 5 or 6                                                                               | 57360  |
| 15                                                                 | 7 or 8                                                                               | 246848 |
| 16                                                                 | 9 or 10 or 11                                                                        | 196993 |
| 17                                                                 | 13 or 14 or 15 or 16                                                                 | 435529 |
| 18                                                                 | 12 and 17                                                                            | 343    |
| <i>Web of Science &lt;1900 to January 13<sup>th</sup> 2023&gt;</i> |                                                                                      |        |
| 1                                                                  | ((ALL=(irreversible electroporation)) OR (ALL=(irreversible electroporation.ti,ab))) | 2092   |
| 2                                                                  | ALL=(colon OR rectum OR colorectal)                                                  | 521934 |

|                                                                     |                                                           |         |
|---------------------------------------------------------------------|-----------------------------------------------------------|---------|
| 3                                                                   | ALL=(neoplasm OR cancer)                                  | 4528674 |
| 4                                                                   | #3 AND #2                                                 | 357482  |
| 5                                                                   | ((ALL=(liver metast*)) AND (ALL=(hepatic metast*)))       | 21341   |
| 6                                                                   | #5 AND #4                                                 | 9140    |
| 7                                                                   | #6 AND #1                                                 | 55      |
| <i>Cochrane Trials Library &lt;January 13<sup>th</sup> 2023&gt;</i> |                                                           |         |
| 1                                                                   | MeSH descriptor: [Electroporation] explode all trees      | 40      |
| 2                                                                   | irreversible electroporation                              | 75      |
| 3                                                                   | colorectal liver metast*                                  | 2039    |
| 4                                                                   | liver metastas*                                           | 5272    |
| 5                                                                   | MeSH descriptor: [Liver Neoplasms] this term only         | 2678    |
| 6                                                                   | MeSH descriptor: [Rectal Neoplasms] this term only        | 1938    |
| 7                                                                   | MeSH descriptor: [Colonic Neoplasms] explode all trees    | 1941    |
| 8                                                                   | MeSH descriptor: [Colorectal Neoplasms] explode all trees | 9388    |
| 9                                                                   | #1 OR #2                                                  | 110     |
| 10                                                                  | #3 OR #4                                                  | 5547    |
| 11                                                                  | #5 OR #6 OR #7 OR #8                                      | 11550   |
| 12                                                                  | #10 OR #11                                                | 15984   |
| 13                                                                  | #9 AND #12                                                | 9       |
